# Supplementary material for: Hydrogen bonded complexes between nitrogen dioxide, nitric acid, nitrous acid and water with SiH3OH and Si(OH)4
Source: Royal Society of Chemistry journal article supplement (doi:10.1039/b303507g), 2003-01-01
Supplement: b303507g.doc [file b303507g.doc]

Supporting information

Structural data for Si(OH)4, SiH3OH, HNO3, HONO, NO2, N2O4, H2O, Si(OH)4HNO3, Si(OH)4HONO, Si(OH)4NO2, Si(OH)4N2O4, Si(OH)4H2O, SiH3OHHNO3 (Type A), SiH3OHHNO3 (Type B), SiH3OHHONO, SiH3OHNO2,SiH3OHN2O4, SiH3OHH2O (Type A) and SiH3OHH2O (Type B).

All geometries give below were calculated at the B3LYP/6-311+G(d) level of theory.

Si(OH)4

Si 0.000000 0.000000 0.000000

O -1.012001 -0.963448 -0.868355

O 1.012001 0.963448 -0.868356

O -0.963448 1.012000 0.868355

O 0.963449 -1.012000 0.868355

H -1.835789 -0.611863 -1.215648

H 1.835790 0.611863 -1.215646

H -0.611863 1.835789 1.215648

H 0.611863 -1.835788 1.215650

SiH3OH

H -1.036552 -0.729086 1.202831

H -1.036476 -0.729832 -1.20242

H -1.035028 1.382384 -0.000439

Si -0.540050 -0.009155 -0.000001

O 1.121303 0.107936 0.000007

H 1.698333 -0.658784 -0.000004

HNO3

N 0.000000 0.156732 0.000000

O -0.984670 0.831247 0.000000

O 1.168319 0.472520 0.000000

O -0.261309 -1.235343 0.000000

H 0.621276 -1.644515 0.000000

HONO

N -0.180006 0.486763 -0.000004

O -1.102580 -0.225587 0.000002

O 1.043936 -0.254429 -0.000003

H 1.729195 0.432789 0.000040

NO2

N 0.000000 0.000000 0.321856

O 0.000000 1.099989 -0.140812

O 0.000000 -1.099989 -0.140812

N2O4

N 0.000000 0.000000 0.904972

N 0.000000 0.000000 -0.904972

O 0.000000 1.096183 -1.361753

O 0.000000 -1.096183 -1.361753

O 0.000000 1.096183 1.361753

O 0.000000 -1.096183 1.361753

H2O

O 0.000000 0.000000 0.114632

H 0.000000 0.774657 -0.458527

H 0.000000 -0.774657 -0.458527

Si(OH)4HNO3

Si 1.671271 -0.042176 -0.016491

O 0.531451 1.151722 0.279343

O 2.805251 0.362311 -1.129919

O 2.443989 -0.197760 1.420398

O 0.833350 -1.314216 -0.593871

H 0.785782 1.881299 0.854049

H 2.650182 0.197014 -2.063875

H 3.328644 -0.568919 1.469339

H -0.057370 -1.512637 -0.276106

N -2.676302 -0.086620 0.026424

O -3.867608 -0.113825 -0.089210

O -1.928418 -1.015169 0.304517

O -2.099631 1.144918 -0.181753

H -1.117995 1.056193 -0.013540

Si(OH)4HONO

Si 1.472039 0.025025 0.022858

O 0.616295 1.293598 0.592920

O 2.153550 -0.991178 1.115690

O 0.375143 -0.926402 -0.802633

O 2.698058 0.620576 -0.892408

H -0.323357 1.228120 0.805618

H 3.006648 -0.790044 1.508848

H 0.624464 -1.828375 -1.025970

H 2.586496 1.446270 -1.371238

O -4.119587 0.239791 0.244120

N -3.284545 -0.372034 -0.301297

O -1.992851 0.096789 0.033914

H -1.355852 -0.467471 -0.461016

Si(OH)4NO2

Si -1.277567 -0.026711 -0.004344

O -0.686719 1.501591 -0.082967

O -2.467721 -0.133138 -1.135803

O 0.018244 -1.027329 -0.225764

O -1.959475 -0.485833 1.419706

H 0.202230 1.698055 0.229911

H -2.398082 0.363735 -1.955146

H -0.059036 -1.959578 -0.004362

H -2.874156 -0.263217 1.611329

O 2.339061 1.006814 0.428569

N 2.656099 0.098836 -0.285239

O 3.309396 -0.881717 -0.131772

Si(OH)4N2O4

Si 1.864482 0.000846 -0.057507

O 2.668570 -1.332791 -0.580915

O 1.421466 0.030399 1.518701

O 2.875894 1.274888 -0.295980

O 0.456459 0.033555 -0.934748

H 3.618512 -1.405295 -0.456937

H 0.597024 -0.366032 1.817361

H 2.755482 2.085288 0.206203

H 0.496963 -0.183214 -1.871426

N -2.074228 0.885390 -0.043174

N -1.962166 -0.885236 0.186321

O -1.469671 -1.190281 1.229033

O -2.402782 -1.502829 -0.724325

O -1.672897 1.491304 0.894161

O -2.541536 1.177796 -1.092445

Si(OH)4H2O

Si 0.573584 0.023902 -0.016223

O -0.422955 -0.865820 0.984650

O 1.780191 0.841128 0.752813

O 1.323431 -1.098447 -0.955285

O -0.398169 1.10957 -0.746304

H -0.102665 -1.711761 1.311295

H 1.614791 1.730637 1.076428

H 2.154411 -0.88873 -1.388984

H -1.354985 0.922450 -0.786534

H -2.300086 -0.507247 0.507148

O -2.836273 -0.013438 -0.136578

H -3.611446 0.336087 0.313402

SiH3OHHNO3 (Type A)

H 3.762736 0.015434 0.245663

H 2.241832 -1.273806 -1.127766

H 1.852974 -1.097359 1.276296

Si 2.353416 -0.414892 0.070266

O 1.413603 0.987173 -0.116936

H 1.812970 1.774975 -0.496352

H -0.268815 1.037571 0.037961

O -1.259282 1.121402 0.112281

N -1.762473 -0.161955 -0.007594

O -2.958736 -0.240046 0.036753

O -0.947110 -1.057859 -0.140393

SiH3OHHNO3 (Type B)

H 2.540562 0.261184 1.656624

H 1.275457 1.423367 -0.009686

H 3.581078 0.875724 -0.465883

Si 2.351586 0.393910 0.191332

O 1.940691 -1.028824 -0.547079

H 1.122147 -1.482088 -0.322544

O -0.942900 -0.816870 0.397064

N -1.847694 -0.075014 0.059047

O -3.020000 -0.288439 0.005035

O -1.478253 1.219071 -0.321084

H -0.503890 1.252670 -0.221978

SiH3OHHONO

H -3.346373 -0.317177 1.208867

H -3.346362 -0.317264 -1.208861

H -2.409482 1.585352 -0.000061

Si -2.610405 0.123946 -0.000010

O -1.049066 -0.517056 0.000019

H -0.909666 -1.468965 0.000048

H 0.515717 0.324746 0.000012

O 1.417396 0.721991 0.000020

N 2.268501 -0.380581 -0.000015

O 3.401962 -0.064669 -0.000009

SiH3OHNO2

H 3.134719 -0.290633 -1.077415

H 2.929142 -0.005079 1.305250

H 1.872177 1.592048 -0.195255

Si 2.229944 0.173887 0.006332

O 0.780097 -0.656750 -0.020409

H 0.739093 -1.610808 0.082958

O -2.285539 -0.927248 0.135810

N -1.914309 0.116058 -0.310685

O -1.806332 1.217454 0.130926

SiH3OHN2O4

H 1.501629 -1.004636 -1.096436

H 2.849724 -1.626587 0.794123

H 3.915135 -0.788993 -1.223943

Si 2.739919 -0.669390 -0.337176

O 2.717783 0.911428 0.178181

H 2.006216 1.255246 0.724865

N -1.892862 -0.738691 0.065894

N -1.171965 0.917224 0.108998

O -1.655672 1.657020 -0.680845

O -0.313428 1.021685 0.929856

O -2.746029 -0.837200 -0.751538

O -1.399877 -1.467096 0.861547

SiH3OHH2O (Type A)

H 2.040102 -0.174746 1.376559

H 2.457344 0.321794 -0.948067

H 1.093089 -1.606724 -0.355501

Si 1.464837 -0.226041 0.009994

O 0.028626 0.642457 -0.069486

H 0.002691 1.580271 0.140185

H -1.754246 0.015476 0.021387

O -2.694395 -0.208282 0.117303

H -3.020550 -0.444894 -0.757012

SiH3OHH2O (Type B).

H -1.544433 -1.077975 1.200827

H -1.543820 -1.079136 -1.199992

H -2.615515 0.729737 -0.000723

Si -1.463129 -0.199499 0.000008

O -0.101638 0.737343 -0.000064

H 0.797286 0.368938 0.000268

O 2.512852 -0.242259 0.000018

H 3.050321 -0.054387 0.777139

H 3.050256 -0.054859 -0.777260
